# Supplementary material for: Functional Characterization of Lycopene β- and ε-Cyclases from a Lutein-Enriched Green Microalga Chlorella sorokiniana FZU60
Source: MDPI journal article supplement (doi:10.3390/md21070418), 2023-07-23
Supplement: s1 [file s1]

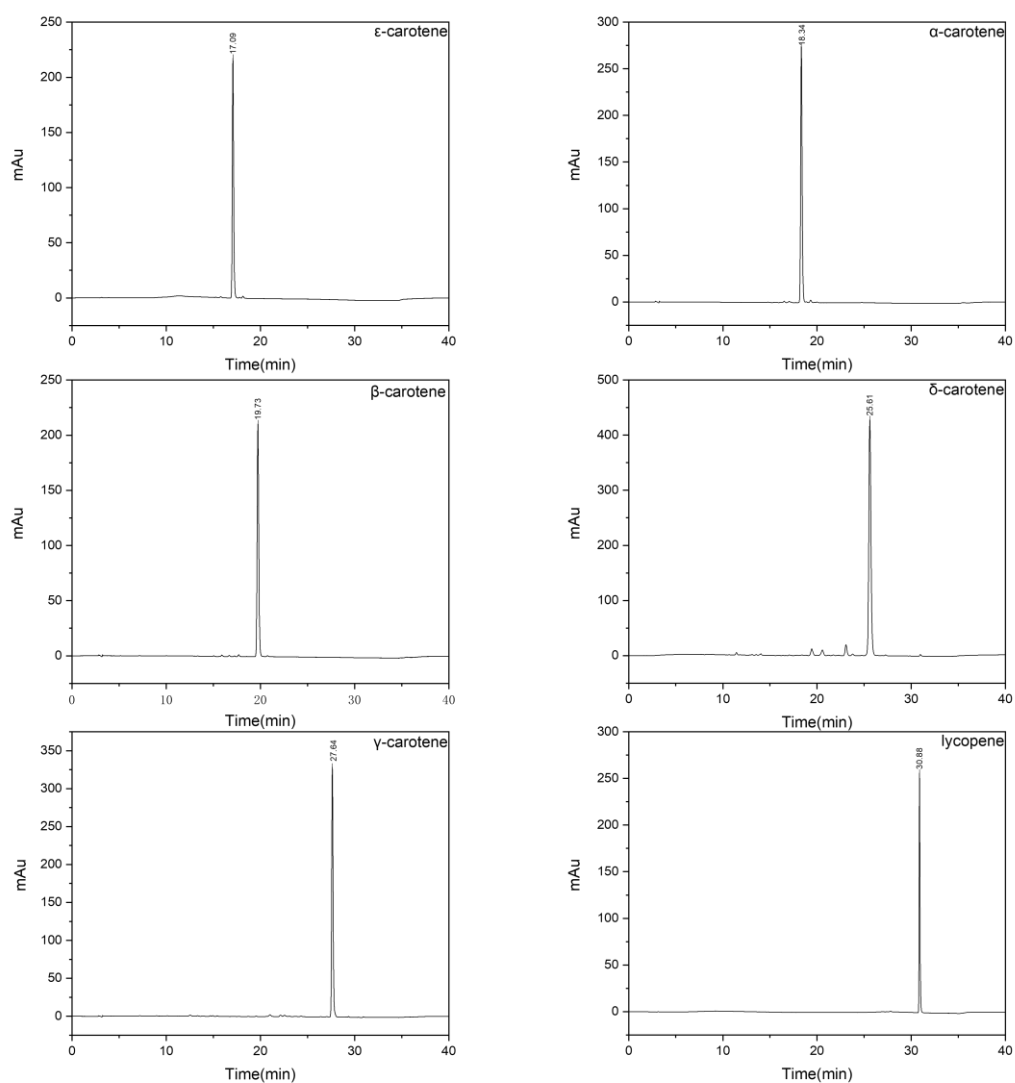

Figure S1 The corresponding retention time of carotenoids analyzed by HPLC.

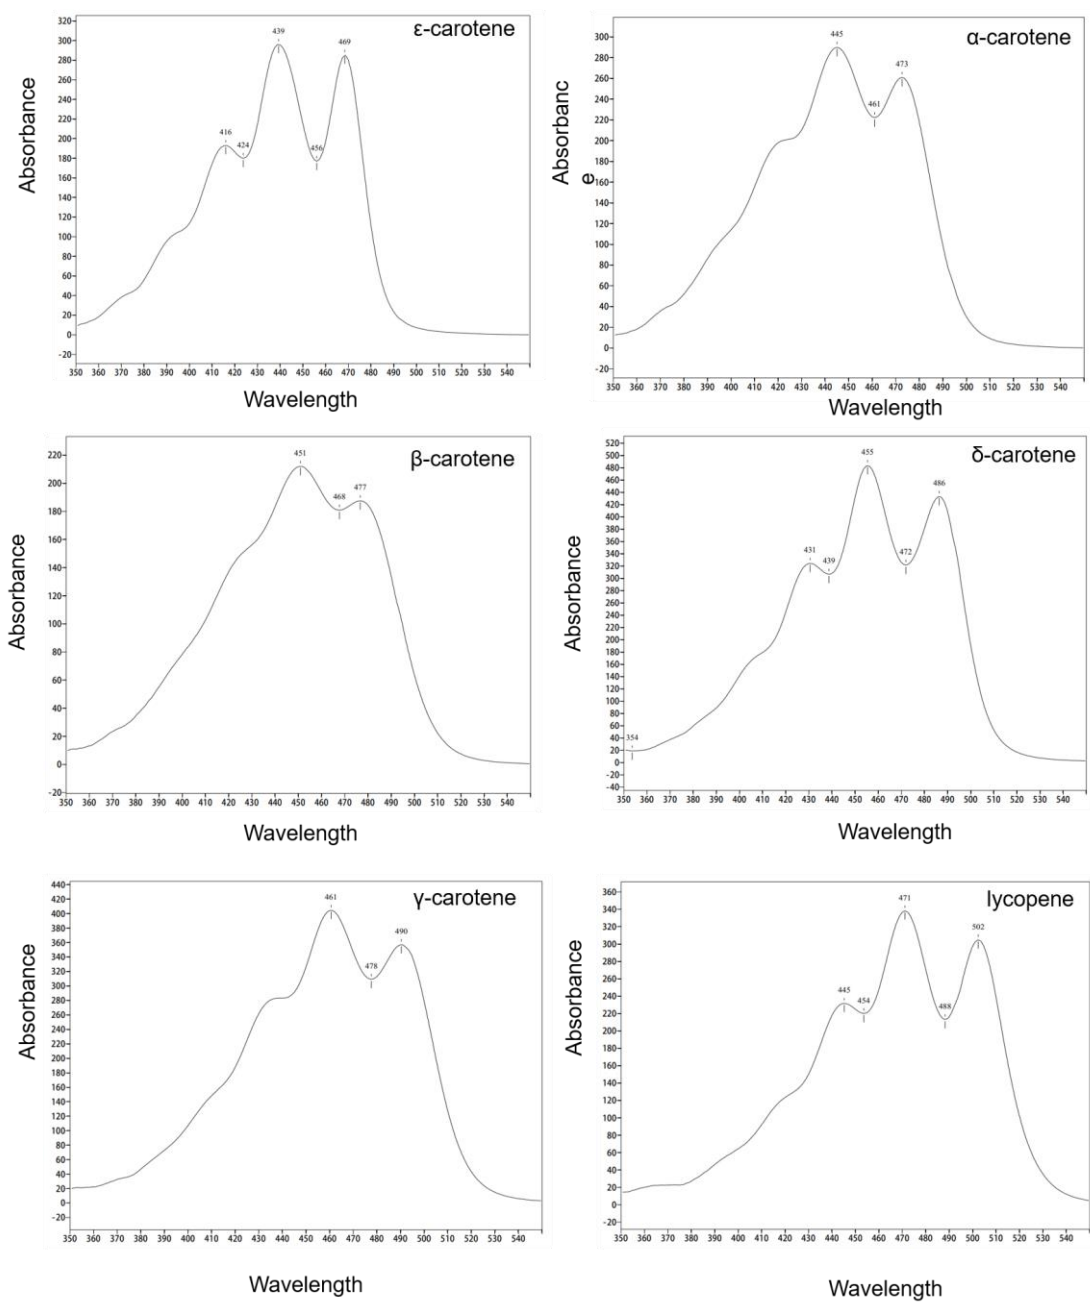

Figure S2 Absorbance spectra of carotenoids analyzed by HPLC.

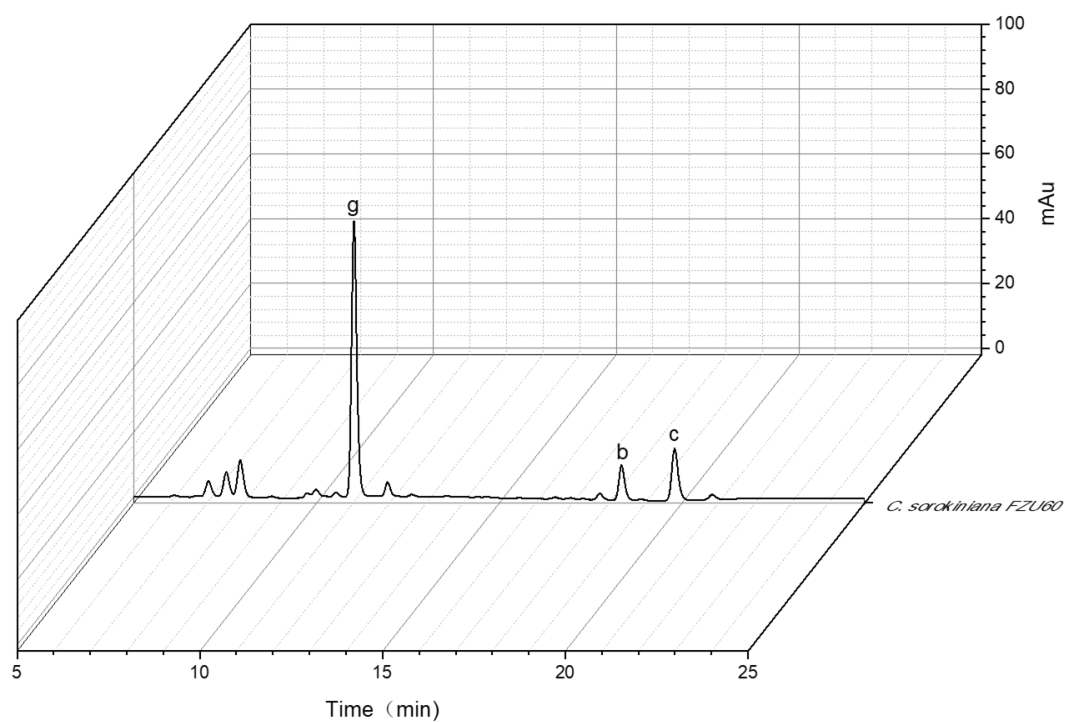

Figure S3 Carotenoid analysis of *C. sorokiniana* FZU60 by HPLC. Peak b,  $\alpha$ -carotene; c,  $\beta$ -carotene; g, Lutein.



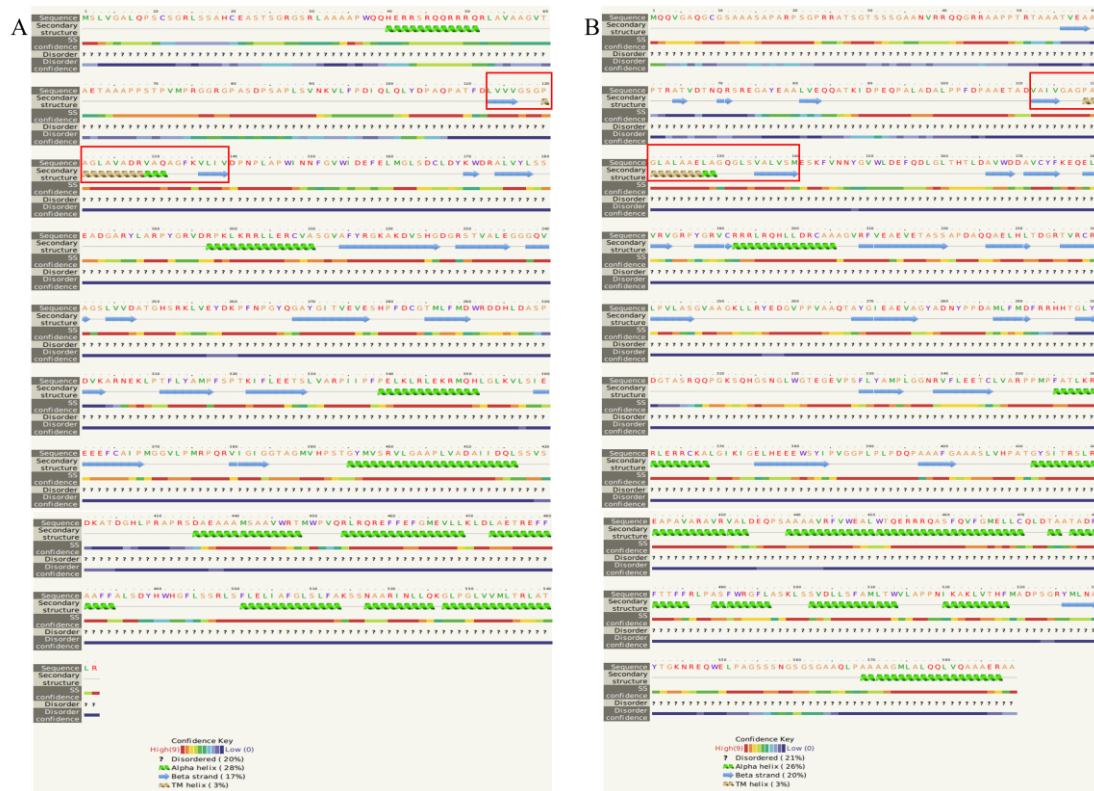

Figure S5 Predicted structures of CsLCYB (A) and CsLCYE (B). The conserved secondary structure of  $\beta$  chain- $\alpha$  helix- $\beta$  chain for binding FAD/NAD cofactor is indicated by red box.

Table S1 Plasmids and strains used in this study.

| Name                        | Characteristics                                                                                        |
|-----------------------------|--------------------------------------------------------------------------------------------------------|
| <b>Plasmids</b>             |                                                                                                        |
| pET-28a                     | Expression vector                                                                                      |
| pTrc99a                     | Expression vector                                                                                      |
| pCAMBIA1300                 | Expression vector                                                                                      |
| pAC-LYC                     | pACYCDuet-1 carrying <i>crtE</i> , <i>crtI</i> , and <i>crtB</i> genes from <i>Pantoea agglomerans</i> |
| pET-B                       | pET -28a carrying <i>CsLCYB</i> gene ( <i>Bam</i> H I)                                                 |
| pET-E                       | pET -28a carrying <i>CsLCYE</i> gene ( <i>Bam</i> H I)                                                 |
| pTrc-B                      | pTrc99a carrying <i>CsLCYB</i> gene ( <i>Eco</i> R I and <i>Hind</i> III)                              |
| pTrc-E                      | pTrc99a carrying <i>CsLCYE</i> gene ( <i>Eco</i> R I and <i>Hind</i> III)                              |
| pTrc-BE                     | pTrc99a carrying <i>CsLCYB</i> and <i>CsLCYE</i> genes ( <i>Eco</i> R I and <i>Hind</i> III)           |
| pCAMBIA1300-CsLCYB-GFP      | pCAMBIA1300 carrying <i>CsLCYB</i> and <i>GFP</i> genes ( <i>Kpn</i> I and <i>Pst</i> I)               |
| pCAMBIA1300-CsLCYE-GFP      | pCAMBIA1300 carrying <i>CsLCYE</i> and <i>GFP</i> genes ( <i>Kpn</i> I and <i>Pst</i> I)               |
| <b>Strains</b>              |                                                                                                        |
| <i>E. coli</i> DH5 $\alpha$ | Host for proliferation                                                                                 |
| <i>E. coli</i> BL21(DE3)    | Host for expression                                                                                    |
| ECOP                        | <i>E. coli</i> BL21(DE3) carrying pAC-LYC and pTrc99a                                                  |
| ECOB                        | <i>E. coli</i> BL21(DE3) carrying pAC-LYC and pTrc -B                                                  |
| ECOE                        | <i>E. coli</i> BL21(DE3) carrying pAC-LYC and pTrc -E                                                  |
| ECOBE                       | <i>E. coli</i> BL21(DE3) carrying pAC-LYC and pTrc-BE                                                  |
| Atu-B                       | <i>Agrobacterium tumefaciens</i> strain GV1301 carrying pCAMBIA1300-CsLCYB-GFP                         |
| Atu-E                       | <i>Agrobacterium tumefaciens</i> strain GV1301 carrying pCAMBIA1300-CsLCYB-GFP                         |

Table S2 Homologous sequences of plasmids and primer sequences for cloning *CsLCYB* and *CsLCYE* genes.

| Name                                                                    | Primer                                     | Amplicon length (bp) |
|-------------------------------------------------------------------------|--------------------------------------------|----------------------|
| <b>Plasmids</b>                                                         | <b>Homologous sequences (5'→3')</b>        |                      |
| pET-28a                                                                 | For GGACAGCAAATGGGTCGCGGATCC               | ——                   |
|                                                                         | Rev GACGGAGCTCGAATTCGGATCC                 |                      |
| pTrc99a                                                                 | For AGGAAACAGACCATGGAATTC                  | ——                   |
|                                                                         | Rev TCCGCCAAAACAGCCAAGCTT                  |                      |
| pCAMBIA1300                                                             | For CGGGGGACGAGCTCGGTACC                   | ——                   |
|                                                                         | Rev CCCTTGCTCACCATGGTACC                   |                      |
| <b>Gene</b>                                                             | <b>Forward and reverse primers (5'→3')</b> |                      |
| <i>CsLCYB</i><br>(for constructing pET-B and pTrc-B)                    | For ATGTCGCTGGTCGGCGC                      | 1629                 |
|                                                                         | Rev TCACCGCAGCGTGGCGA                      |                      |
| <i>CsLCYE</i><br>(for constructing pET-E and pTrc-E)                    | For ATGCAGCAGGTGGGAGCCCA                   | 1770                 |
|                                                                         | Rev TCACGCGGCCCGCTCT                       |                      |
| <i>CsLCYB</i><br>(for constructing pTrc-BE)                             | For ATGTCGCTGGTCGGCGC                      | 1626                 |
|                                                                         | Rev ACCTGCTGCATCCGCAGCGTGGCGAGCCGCGTCA     |                      |
| <i>CsLCYE</i><br>(for constructing pTrc-BE)                             | For ACGCTGCGGATGCAGCAGGTGGGAGCCCA          | 1770                 |
|                                                                         | Rev TCACGCGGCCCGCTCTGC                     |                      |
| <i>CsLCYB</i><br>(for constructing pCAMBIA1300-C <sub>s</sub> LCYB-GFP) | For ATGTCGCTGGTCGGCGC                      | 1626                 |
|                                                                         | Rev CCGCAGCGTGGCGAGCC                      |                      |
| <i>CsLCYE</i><br>(for constructing pCAMBIA1300-C <sub>s</sub> LCYB-GFP) | For ATGCAGCAGGTGGGAGCCCA                   | 1767                 |
|                                                                         | Rev CGCGGCCCGCTCTGCC                       |                      |
